# Supplementary material for: Amplicon-Based, Next-Generation Sequencing Approaches to Characterize Single Nucleotide Polymorphisms of Orthohantavirus Species
Source: Front Cell Infect Microbiol. 2020 Oct 14;10:565591. doi: 10.3389/fcimb.2020.565591 (PMC7591466; doi:10.3389/fcimb.2020.565591)
Supplement: Supplementary file 1 [file Table_1.XLSX]

## Sheet: Primers_one-step
Supplementary Table 1. One-Step Primer Sets of ANDV, DOBV and HTNV
	ANDV				DOBV and HTNV
	Forward Primer		Reverse Primer		Forward Primer		Reverse Primer
Gene Segment	Genome Location	Sequence	Genome Location	Sequence	Genome Location	Sequence	Genome Location	Sequence
S	1-31	GTA GTA GAC TCC TTG AGA AGC TAC TGC TG	1834-1871	TAG TAG TAT GCT CCT TGA AAA GCA ATC AAG AAA AAT C	1-30	TAGTAGTAKRCTCCCTAAARAGCACTAYAC	1687-1721	TAGTAGTAGRCTCCCTAAAAAGACATTCAGGAAGC
M	1-36	TAGTAGTAGACTCCGCAAGAAGAAGCAAAAAATTAAAG	3644-3671	TAG TAG TAT GCT CCG CAG GAA CAA AAG C	1-25	TAG TAG TAG ACT CCG CAA GAA AYA G	3620-3644	TAG TAG TAK GCT CCG CAR GAT ATA G
L	1-39	TAGTAGTAGACTCCGGGATAGAAAAAGTTAGAAAAATGG	3507-3539	GT AGG TGA TAC TGT TGT CTT CTT AGG TGA CAC	1-30	TAG TAG TAG ACT CCG GAA GAG ACA AAC TAC	3191-3216	CA TYC CKA CAC CGA AAA GAG ATG AAC
L	3006-3041	CAA GCA ATA TAT GAT GGC TTA TCA GAC AAC AAA CTG	6522-6562	TAGTAGTATGCTCCGGGAAAAGAACACTACAATATACATAC

## Sheet: Primers_two-step
Supplementary Table 2. Two-Step Primer Sets of ANDV, PHV and SNV
Gene	ANDV				PHV				SNV
	Forward Primer		Reverse Primer		Forward Primer		Reverse Primer		Forward Primer		Reverse Primer
	Genome Location	Sequence	Genome Location	Sequence	Genome Location	Sequence	Genome Location	Sequence	Genome Location	Sequence	Genome Location	Sequence
S	1-31F	GTA GTA GAC TCC TTG AGA AGC TAC TGC TG	502-533R	GAA GAA TCA TCC TTA AAC CTT ATC CTG GTC CC	7-41F	TAG ACT TCG TAA AGA GCT ACT ACT ACA AGT GCT G	501-530R	CTA TCA TCT TTG AAC CTG ATC CTT GTC CCC	1-32F	TAGTAGTAGACTCCTTGAGAAGCTACTACGAC	522-552R	CCCATTGACCTCTTCATAAGATGAATCATCC
S	502-533F	GGGACCAGG ATAAGGTTTA AGGATGATTC TTC	1003-1024R	CAA GTT CCG GTA CCC CTG CAA C	501-530F	GGG GAC AAG GAT CAG GTT CAA AGA TGA TAG	1024-1043R	GCG CCA AGT TCT GCC ATC C	522-552F	GGATGATTCATCTTATGAAGAGGTCAATGGG	1036-1062R	GGTGTTTCTCATATCCTGGAGAATGGC
S	1003-1024F	GTT GCA GGG GTA CCG GAA CTT G	1501-1528R	CCT TAG TGC AAA TAC AAT GTA GTG GCC C	933-1022F	CCG ATG TCC ACC AAC ATG CAT CTA TAT TGC	1635-1672R	TAG TAT ACT CCT TGA AAA GCA ATC AAG AAA ACA CAC TG	1036-1062F	GCCATTCTCCAGGATATGAGAAACACC	1542-1570R	CAAACCTAACAGAACTTAACAGAACTAACAGAACTTAAC
S	1501-1528F	GGG CCA CTA CAT TGT ATT TGC ACT AAG G	1834-1871R	TAG TAG TAT GCT CCT TGA AAA GCA ATC AAG AAA AAT C					1542-1570F	GTTAAGTTCTGTTAGTTCTGTTAAGTTCTGTTAGGTTTG	2038-2083R	TAGTAGTAGACTCCTTGAAAAGCAATCAAGAATTTACTTATAATG
M	1-36F	TAG TAG TAG ACT CCG CAA GAA GAA GCA AAA AAT TAA AG	499-533R	CAA CTT CTT ATT GAC ATG CAT GTC AAT ACA GGT GC	1-32F	TAG TAG TAG ACT CCG CAA GAA GAA GCA AAC AC	501-532R	GCT CTT TGT TGT CAC ACA TGT ATG TAT GGG AG	1-30F	TAG TAG TAG ACT CCG CAC GAA GAA GCA AAC	541-565R	CCT GGA TCC TGC TAG ATA ACA GAC C
M	499-533F	GCA CCT GTA TTG ACA TGC ATG TCA ATA AGA AGT TG	989-1010R	GCA AAG GCT GTC CCC TTT AGG G	541-570F	GGG ATT AGG AAC TCA ACG GAT TCA AGT GAC	996-1022R	GTC CTG AAA ATG CTA CAC CTT GGA CAG	541-565F	GGT CTG TTA TCT AGC AGG ATC CAG G	1021-1042R	CTC ACA AGA GTT GAG AAT GAG CTA TAC ATT GG
M	989-1010F	CCC TAA AGG GGA CAG CCT TTG C	1501-1522R	GAA GCA TGA CAG TGG CCC ATC C	996-1022F	CTG TCC AAG GTG TAG CAT TTT CAG GAC	1536-1577R	CTA GAG ATA TGA TAG GGA TAA GGA GCC AGC C	1021-1042F	CCA ATG TAT AGC TCA TTC TCA ACT CTT GTG AG	1501-1532R	GTA ATA AGT AGT GCT GTT GTA GCC CAG CCA TG
M	1501-1522F	GGA TGG GCC ACT GTC ATG CTT C	2000-2026R	CTG ACT CCA TTA GTG GAG TCT CTG CAC	1501-1532F	CAT ACA CGG GTG GTC AAC AAT TGC TTT ACT TG	1998-2011R	CTA CAG TAT CCG CAC TTG CAG CC	1501-1532F	CAT GGC TGG GCT ACA ACA GCA CTA CTT ATT AC	2042-2060R	CAT AGG GAC TAT ACC TAC ACC ATG TGC TG
M	2000-2026F	GTG CAG AGA CTC CAC TAA TGG AGT CAG	2488-2519R	GCA TCA ATA TGC TTG CAA GTT TGT TCT GTT CC	1998-2011F	GGC TGC AAG TGC GGA TAC TGT AG	2495-2522R	CAA TGG TCT TAC ATG ATT GTT CAC TGC C	2042-2060F	CAG CAC ATG GTG TAG GTA TAG TCC CTA TG	2459-2492R	CCC AAT TGA ATA CAC ACC TTT CGC GTG TAT TTG
M	2488-2519F	GGA ACA GAA CAA ACT TGC AAG CAT ATT GAT GC	3002-3028R	GTG TAA ACC CTA CAC CAG AAC CCC ATG	2495-2522F	GGC AGT GAA CAA TCA TGT AAG ACC ATT G	3002-3021R	CCT GAG CCC CAT GCA CCA TC	2459-2492F	CAA ATA CAC GCG AAA GGT GTG TAT TCA ATT GGG	3002-3021R	CAC TCC TGA TCC CCA AGC CC
M	3002-3028F	CAT GGG GTT CTG GTG TAG GGT TTA CAC	3644-3671R	TAG TAG TAT GCT CCG CAG GAA CAA AAG C	3002-3021F	GAT GGT GCA TGG GGC TCA GG	3677-3707R	TAG TAG TAG ACT CCG CAG GAA CAA AAG TCC	3002-3021F	GGG CTT GGG GAT CAG GAG TG	3667-3696R	TAG TAG TAT GCT CCG CAG GAA CAA AAG CC
L	1-39F	TAGTAGTAGACTCCGGGATAGAAAAAGTTAGAAAAATGG	503-532R	GATCCATCTGTTTTAACTGCAACCACTGAG	1-40F	TAG TAG TAG ACT CCG AGA TAG AGA AGT CTA CTA AAA ATG G	514-537R	GTT TGA CCC GTC TGT ACG AAC TGC	1-49F	TAGTAGTAGA CTCCGAGATA GAGAAATTTA GAAAAATGG	541-571R	CAT CAT TAC GCC GAC TAG GCC ATT GAG TAG
L	503-532F	CTCAGTGGTTGCAGTTAAAACAGATGGATC	1007-1032R	GCA TCT GTA CTG GTG TTT CTG GTT GG	504-520F	CGA TGT TGT AGC AGT TCG TAC AGA CGG	999-1026R	GAC TGG TGT TTC TGG GTA GTT CCT CAA C	541-571F	CTACTCAATG GCCTAGTCGG CGTAATGATG	1021-1048R	GCC ATA TCT ACT GCT ATT GCT TGC ACT G
L	1007-1032F	CCA ACC AGA AAC ACC AGT ACA GAT GC	1509-1532R	CCA ATA TTT AGA ACG GCG CAG CCC	998-1027F	GTT GAG GAA CTA CCC AGA AAC ACC AGT CC	1501-1544R	CAG ACC AAT ATT TAG ACC TTT TCA ACC CTG CAT G	1021-1048F	CAGTGCAAGC AATAGCAGTA GATATGGC	1567-1596R	CTC TAG GGA TTT TGA AGG GAG GAT GAA CAG
L	1509-1532F	GGG CTG CGC CGT TCT AAA TAT TGG	1983-2016R	GGTATACATCCAGTGAACTCTTAAATGGTCTCTC	1501-1544F	CAT GCA GGG TTG AAA AGG TCT AAA TAT TGG TCT G	2004-2040R	CAG CAA GGT TTT GAC AAT GGA GTA AAT GTA AAC CTC	1567-1596F	CTGTT CATCCTCCCT TCAAAATCCC TAGAG	2066-2094R	GGA GAC GCA CTT TAG AAT AAA ACC GTA CC
L	1983-2016F	GAGAGACCATTTAAGAGTTCACTGGATGTATACC	2484-2514R	GTG TTT GAC TGA AAT ATG GTT TGT CCC AGT G	2004-2040F	GAG GTT TAC ATT TAC TCC ATT GTC AAA ACC TTG CTG	2502-2526R	CAA GCT GAT ATT GCG GGT CTG ACT G	2066-2094F	GGT ACG GTT TTA TTC TAA AGT GCG TCT CC	2526-2540R	GCA ATG CCC CGG ACA TAC CTT TTA G
L	2484-2514F	CAC TGG GAC AAA CCA TAT TTC AGT CAA ACA C	3006-3041R	CAG TTT GTT GTC TGA TAA GCC ATC ATA TAT TGC TTG	2502-2526F	C AGT CAG ACC CGC AAT ATC AGC TTG	3002-3028R	CTC GTA GCC CAT CAT ACA AAG CCT GAG	2526-2540F	CTA AAA GGT ATG TCC GGG GCA TTG C	3004-3043R	CAT CTG ACA GAC CAT CAT ATA AAG CCT GTG
L	3006-3041F	CAA GCA ATA TAT GAT GGC TTA TCA GAC AAC AAA CTG	3507-3538R	GT AGG TGA TAC TGT TGT CTT CTT AGG TGA CAC	3002-3028F	CTC AGG CTT TGT ATG ATG GGC TAC GAG	3509-3541R	CAT TAG TTG GAG AAA CTG TTG TCT TCT TTG GGG	3004-3043F	CAC AGG CTT TAT ATG ATG GTC TGT CAG ATG	3543-3572R	CCC TCA AAA AAT GTG GAA AGG AAC TCT GC
L	3507-3538F	GTG TCA CCT AAG AAG ACA ACA GTA TCA CCT AC	3993-4019R	CAATCGGTCGTGCTGGAATACATCCTC	3504-3536F	GAT ATC CCC AAA GAA GAC AAC AGT TTC TCC AAC	4002-4028R	CTG AAT TCG CCT AAC CTG TCA TGC TG	3543-3572F	GCAGAGTT CCTTTCCACA TTTTTTGAGG G	3984-4015R	CTA TCA TGC TGG AAG ACA TCC TCA CTG AGA G
L	3993-4019F	GAGGATGTATTCCAGCACGACCGATTG	4504-4531R	GC CTG GTC CTT TTC TCT AAC AGT GAA TG	4002-4028F	CAG CAT GAC AGG TTA GGC GAA TTC AG	4502-4534R	GGA TCG ATT GAT CCC TTT CTT TAA CAG TGA AAG	3984-4015F	CTC TCA GTG AGG ATG TCT TCC AGC ATG ATA G	4501-4530R	CTT GGT CTT TTT CAC GCA CTG TGA AAG TTC
L	4504-4531F	CAT TCA CTG TTA GAG AAA AGG ACC AGG C	5010-5044R	CTT CTA AAC CTT TCT ACC CAA TCC ATC AAT GTC TG	4502-4534F	CTT TCA CTG TTA AAG AAA GGG ATC AAT CGA TCC	5002-2029R	GGA CCC AAT CCA GCA GTG TTT TTG ACT C	4501-4530F	GAA CTT TCA CAG TGC GTG AAA AAG ACC AAG	5021-5050R	CCT TTT CTA CGA AAT CTC TCT ACC CAG TCC
L	5010-5044F	CAGACATTGATGGATTGGGTAGAAAGGTTTAGAAG	5492-5516R	CTGTTTCGTACGAAGCCCAGTTCTC	5002-5029F	GAG TCA AAA ACA CTG CTG GAT TGG GTC C	5492-5520R	CAC TGT TGC TTT TGT TCT AAG CCC AGT AC	5021-5050F	GGA CTG GGT AGA GAG ATT TCG TAG AAA AGG	5537-5566R	GCT CTG AAC CCA TCT GCT TGA ACA TTT ATC
L	5492-5516F	GAGAACTGGGCTTCGTACGAAACAG	6029-6060R	CATCCTGCAGAAAGTGTTGTATATCCTCTTCC	5492-5520F	GTA CTG GGC TTA GAA CAA AAG CAA CAG TG	6001-6040R	CCT CTA GGT TTA TTG TTT CAA AAT CAA TGT CAT CTA GGT C	5537-5566F	GAT AAA TGT TCA AGC AGA TGG GTT CAG AGC	5994-6036R	CTT CAT CTA GAT TGA TCT GTT CAA AAT CTA TAT CAT CAA GAG C
L	6029-6060F	GGAAGAGGATATACAACACTTTCTGCAGGATG	6522-6562R	TAGTAGTATGCTCCGGGAAAAGAACACTACAATATACATAC	6001-6040F	GAC CTA GAT GAC ATT GAT TTT GAA ACA ATA AAC CTA GAG G	6521-6551R	TAG TAG TAT GCT CCG AGA AAA GAG CAA ATA GAA GAA AAG	5994-6036F	GCT CTT GAT GAT ATA GAT TTT GAA CAG ATC AAT CTA GAT GAA G	6531-6562R	TAG TAG TAT GCT CCG AGA ACA GAG CAG TAG AG

## Sheet: ANDV_NGS_Results
Supplementary Table 3. Illumina MiSeq results of ANDV vRNA sequenced from a whole genome multiplex and a disjointed tiling scheme.
Sample Source	PCR Cycle	Pool	Large Segment			Medium Segment			Small Segment
			Aligned Reads	Average Depth of Coverage	% Genome Coverage*	Aligned Reads	Average Depth of Coverage	% Genome Coverage*	Aligned Reads	Average Depth of Coverage	% Genome Coverage*
Supernatant	1x	1	302408	3,421x	100	410176	8,327x	100	74975	2,983x	100
		3	256027	2,894x	100	289473	5,883x	100	65771	2,619x	100
	7x	1	331940	3,740x	100	384465	7,788x	100	100282	3,972x	100
		3	257102	2,892x	100	189339	3,847x	100	61491	2,442x	100
	15x	1	221388	2,499x	100	226228	4,581x	100	89447	3,567x	100
		3	248051	2,774x	100	116876	4,586x	100	167009	3,345x	100
	20x	1	243832	2,750x	100	255495	5,153x	100	118743	4,714x	100
		3	293016	3,328x	100	371199	7,545x	100	157028	6,258x	100
Cells	1x	1	4100	47x	100	7361	150x	100	1376	55x	99
		3	6168	70x	100	7985	163x	100	2263	90x	99
	7x	1	4047	46x	100	5904	120x	97	1924	77x	99
		3	23597	268x	100	36891	751x	100	17960	717x	100
	15x	1	3668	42x	100	4970	101x	96	2097	83x	99
		3	85244	969x	100	162069	3,293x	100	110144	4,376x	100
	20x	1	20861	237x	100	28989	590x	99	17589	700x	100
		3	121818	1,390x	100	370202	7,509x	99	192060	7,624x	100
*A threshold of 50x depth of coverage was used to obtain the percent genome coverage

## Sheet: ANDV_PIM
Supplementary Table 4. ANDV Percent Identity Matrix of Consensus Sequences
Source			Supernatant								Cell Culture								ANDV lab consensus strain	Genbank Reference (AF291704.5, AF291703.2 AF291702.1)
	No. PCR Cycles		1x		7x		15x		20x		1x		7x		15x		20x
		Pool	1	3	1	3	1	3	1	3	1	3	1	3	1	3	1	3
Supernatant	1x	1	100	100	100	99.98	99.98	99.92	99.94	99.98	98.66	97.8	96.74	99.76	98.43	99.63	99.2	99.98	99.99	99.93
		3	100	100	100	99.99	99.99	99.93	99.95	99.98	98.66	97.8	96.74	99.77	98.43	99.63	99.2	99.98	100	99.94
	7x	1	100	100	100	99.99	99.99	99.93	99.95	99.98	98.66	97.8	96.74	99.77	98.43	99.63	99.2	99.98	100	99.94
		3	99.98	99.99	99.99	100	100	99.94	99.95	99.99	98.64	97.82	96.76	99.76	98.43	99.62	99.21	99.98	99.99	99.95
	15x	1	99.98	99.99	99.99	100	100	99.94	99.96	100	98.64	97.82	96.76	99.76	98.43	99.63	99.21	99.98	99.99	99.96
		3	99.92	99.93	99.93	99.94	99.94	100	99.88	99.94	98.64	97.82	96.76	99.75	98.43	99.67	99.39	99.92	99.92	99.91
	20x	1	99.94	99.95	99.95	99.95	99.96	99.88	100	99.95	98.64	97.82	96.76	99.71	98.43	99.58	99.21	99.94	99.93	99.9
		3	99.98	99.98	99.98	99.99	100	99.94	99.95	100	98.64	97.82	96.76	99.77	98.43	99.63	99.21	99.99	99.98	99.95
Cell Culture	1x	1	98.66	98.66	98.66	98.64	98.64	98.64	98.64	98.64	100	99.08	99.61	98.66	98.04	98.64	98.64	98.62	98.66	98.6
		3	97.8	97.8	97.8	97.82	97.82	97.82	97.82	97.82	99.08	100	98.37	97.8	98.99	97.82	97.9	97.82	97.8	97.8
	7x	1	96.74	96.74	96.74	96.76	96.76	96.76	96.76	96.76	99.61	98.37	100	96.78	99.73	96.76	97.09	96.76	96.74	96.74
		3	99.76	99.77	99.77	99.76	99.76	99.75	99.71	99.77	98.66	97.8	96.78	100	98.45	99.77	99.58	99.76	99.75	99.72
	15x	1	98.43	98.43	98.43	98.43	98.43	98.43	98.43	98.43	98.04	98.99	99.73	98.45	100	98.43	98.49	98.43	98.43	98.41
		3	99.63	99.63	99.63	99.62	99.63	99.67	99.58	99.63	98.64	97.82	96.76	99.77	98.43	100	99.29	99.64	99.61	99.58
	20x	1	99.2	99.2	99.2	99.21	99.21	99.39	99.21	99.21	98.64	97.9	97.09	99.58	98.49	99.29	100	99.2	99.2	99.16
		3	99.98	99.98	99.98	99.98	99.98	99.92	99.94	99.99	98.62	97.82	96.76	99.76	98.43	99.64	99.2	100	99.97	99.96
ANDV lab consensus strain			99.99	100	100	99.99	99.99	99.92	99.93	99.98	98.66	97.8	96.74	99.75	98.43	99.61	99.2	99.97	100	99.93
Genbank Reference (AF291704.5, AF291703.2 AF291702.1)			99.93	99.94	99.94	99.95	99.96	99.91	99.9	99.95	98.6	97.8	96.74	99.72	98.41	99.58	99.16	99.96	99.93	100
Nucleotide above, amino acid below

## Sheet: PHV_Sequencing_Results
Supplementary Table 5. ONT sequence run of PHV vRNA using a whole genome multiplex and a segment-specific tiling scheme.
Sample Source	PCR Cycle	Pool	Large Segment			Medium Segment			Small Segment
			Aligned Reads	Average Depth of Coverage	% Genome Coverage	Aligned Reads	Average Depth of Coverage	% Genome Coverage	Aligned Reads	Average Depth of Coverage	% Genome Coverage
Supernatant	cDNA	1	1084	76x	95	1363	185x	97	894	275x	100
		3	1210	91x	94	1465	202x	100	873	280x	100
	7x	1	1142	80x	98	1481	201x	100	934	292x	100
		3	1616	115x	99	1776	238x	100	1073	336x	100
	30x	1	4480	365x	100	4096	577x	100	1341	447x	100
		3	2214	157x	100	5035	706x	100	2171	692x	100
Cells	cDNA	1	4205	332x	100	4458	628x	100	906	289x	100
		3	5335	398x	100	6264	853	100	1644	506x	100
	7x	1	538060	38,988x	100	634885	90,685x	100	144741	47,489x	100
		3	138372	10,120x	100	276186	38,213x	100	186084	59,375x	100
	30x	1	437133	30,599x	100	558302	76,314x	100	25831	7,432x	100
		3	308755	21,444x	100	237003	31,281x	100	45838	12,880x	100
Genome coverage calculation: ((X bases / genome length) x 100), where ‘X bases’ is the number of bases covered by at least one read.

## Sheet: PHV_PIM
Supplementary Table 6. PHV Percent Identity Matrix of Consensus Sequences
Source			Supernatant						Cell Culture						ANDV lab consensus strain	Genbank Reference (EF646763.1, X55129.1, M34011.1)
	No. PCR Cycles		cDNA		7x		30x		cDNA		7x		30x
		Pool	1	3	1	3	1	3	1	3	1	3	1	3
Supernatant	cDNA	1	100	99.97	99.97	99.96	99.95	100	99.99	99.99	100	99.96	100	99.95	99.94	99.29
		3	99.97	100	99.91	99.93	99.93	99.95	99.95	99.95	99.95	99.9	99.95	99.9	99.89	99.26
	7x	1	99.97	99.91	100	99.84	99.83	99.86	99.87	99.87	99.86	99.82	99.86	99.8	99.82	99.17
		3	99.96	99.93	99.84	100	99.95	99.95	99.97	99.97	99.97	99.91	99.97	99.89	99.9	99.25
	30x	1	99.95	99.93	99.83	99.95	100	99.83	99.97	99.97	99.97	99.91	99.97	99.9	99.92	99.26
		3	100	99.95	99.86	99.95	99.83	100	99.86	99.86	99.86	99.81	99.86	99.81	99.81	99.16
Cell Culture	1x	1	99.99	99.95	99.87	99.97	99.97	99.86	100	100	99.99	99.95	99.99	99.94	99.94	99.31
		3	99.99	99.95	99.87	99.97	99.97	99.86	100	100	99.99	99.95	99.99	99.94	99.94	99.31
	7x	1	100	99.95	99.86	99.97	99.97	99.86	99.99	99.99	100	99.96	100	99.95	99.93	99.3
		3	99.96	99.9	99.82	99.91	99.91	99.81	99.95	99.95	99.96	100	99.96	99.99	99.89	99.26
	15x	1	100	99.95	99.86	99.97	99.97	99.86	99.99	99.99	100	99.96	100	99.95	99.93	99.3
		3	99.95	99.9	99.8	99.89	99.9	99.81	99.94	99.94	99.95	99.99	99.95	100	99.88	99.27
PHV lab consensus strain			99.94	99.89	99.82	99.9	99.92	99.81	99.94	99.94	99.93	99.89	99.93	99.88	100	99.25
Genbank Reference (EF646763.1, X55129.1, M34011.1)			99.29	99.26	99.17	99.25	99.26	99.16	99.31	99.31	99.3	99.26	99.3	99.27	99.25	100
Nucleotide above, amino acid below

## Sheet: ANDV_SNP_summary_table
Supplementary Table 7. SNP summary from ANDV genome isolated from cell culture supernatant and sequenced on the Illumina MiSeq.
Gene	PCR Amplification	Nucleotide Position	MiSeq Reference Lab Strain	Sanger Genbank Reference	SNP	AA Change (MiSeq:SNP)	Primer Pool	SNP Frequency (%)
S	1x	104	C	C	T	A21V	1	4
S	1x	179	A	G	G	N46S	1	25
S	1x	771	G	G	A	E243E	1	1
S	1x	1421	G	G	A	Outside ORF	1	2
S	1x	1488	C	C	T	Outside ORF	1	11
S	1x	1751	G	G	A	Outside ORF	1	1
S	1x	1862	C	C	T	Outside ORF	1	1
S	7x	179	A	G	G	N46S	1, 3	24, 20
S	7x	535	T	T	C	F145F	1	11
S	15x	104	C	C	T	A21V	3	7
S	15x	179	A	G	G	N46S	1	24
S	20x	179	A	G	G	N46S	1, 3	23, 20
S	20x	535	T	T	C	F145F	1	19
S	20x	1488	C	C	T	Outside ORF	1	15
M	1x	485	C	C	T	T145I	1	1
M	1x	699	C	C	T	F216F	1	1
M	1x	708	G	G	A	K219K	1	5
M	1x	843	G	G	A	L264L	1	1
M	1x	1578	A	A	G	L509L	1	1
M	1x	2758	A	A	G	T903A	1	1
M	7x	708	G	G	A	K219K	1	5
L	1x	34	A	A	G	Outside ORF	1	1
L	1x	567	G	G	A	D178N	1	2
L	1x	858	G	G	A	E275K	1	1
L	1x	1300	A	A	C	E422A	1	1
L	1x	1352	G	G	A	M439I	1	11
L	1x	3407	T	G	G	H1124Q	1	8
L	1x	3435	G	G	A	A1134T	1	1
L	1x	3692	G	G	T	L1219F	1	8
L	1x	4035	G	G	A	S1332N	1	7
L	1x	4609	G	G	T	S1525I	1	2
L	1x	5050	G	G	A	G1672E	1	2
L	1x	5517	C	C	A	P1828T	1, 3	48, 45
L	1x	5945	G	G	A	M1970I	1	2
L	1x	6345	T	T	C	F2104L	1, 3	45, 47
L	1x	6375	G	G	T	V2114F	1	1
L	1x	6389	G	G	A	K2118K	1	2
L	1x	6553	G	C	C	Outside ORF	1, 3	16, 20
L	7x	5517	C	C	A	P1828T	1, 3	47, 44
L	7x	6345	T	T	C	F2104L	1, 3	47, 49
L	7x	6553	G	C	C	Outside ORF	1, 3	16, 23
L	15x	5517	C	C	A	P1828T	1	45
L	15x	6183	G	G	A	A2050T	1, 3	5, 4
L	15x	6295	T	C	C	I2087T	1, 3	13, 10
L	15x	6345	T	T	C	F2104L	1, 3	47, 48
L	20x	5517	C	C	A	P1828T	3	43
L	20x	6183	G	G	A	A2050T	1	5
L	20x	6295	T	C	C	I2087T	1	13
L	20x	6345	T	T	C	F2104L	1, 3	46, 42
Supplementary Table 8. SNP summary from ANDV genome isolated from cell culture and sequenced on the Illumina MiSeq.
Gene	PCR Amplification	Nucleotide Position	MiSeq Reference Lab Strain	Sanger Genbank Reference	SNP	AA Change (MiSeq:SNP)	Primer Pool	SNP Frequency (%)
S	15x	179	A	G	G	N46S	3	39
S	15x	1488	C	C	T	Outside ORF	3	13
S	20x	179	A	G	G	N46S	3	38
M	20x	534	T	T	C	C161C	3	8
L	7x	6345	T	T	C	F2104L	3	50
L	15x	6295	T	C	C	I2087T	3	11
L	15x	6345	T	T	C	F2104L	3	49
L	20x	5517	C	C	A	P1828T	3	48
L	20x	6345	T	T	C	F2104L	1, 3	44, 43

## Sheet: PHV_SNP_summary_tables
Supplementary Table 9. SNP summary from PHV genome isolated from cell culture supernatant and sequenced on the MinION platform.
Gene	PCR cycle	Nucleotide Position	MiSeq Reference Lab Strain	Sanger Genbank Reference	SNP	AA Change (MiSeq:SNP)	Primer Pool	SNP Frequency (%)
S	cDNA	493-494	GA	GA	TG	E151W	1,3	35, 38
S	cDNA	1039	T	G	C	G333G	1, 3	30, 73
S	cDNA	1514	A	G	G	outside ORF	1, 3	24, 38
S	7x	493-494	GA	GA	TG	E151W	3	29
S	7x	1039	T	G	C	G333G	1, 3	32, 26
S	7x	1144	G	T	A	S368S	1	12
S	7x	1514	A	G	G	outside ORF	1, 3	38, 26
S	30x	493-494	GA	GA	TG	E151W	1, 3	31, 33
S	30x	1039	T	G	C	G333G	1, 3	16, 19
S	30x	1514	A	G	G	outside ORF	1, 3	37, 34
M	cDNA	650	C	C	A	Q201K	1, 3	13, 12
M	cDNA	1173	G	G	A	G375E	1, 3	28, 27
M	cDNA	1349	G	G	A	D434N	1	12
M	cDNA	2022	A	A	C	E658A	1, 3	15, 15
M	cDNA	3022	T	T	A	G991G	1	13
M	7x	650	C	C	A	Q201K	1, 3	13, 13
M	7x	1173	G	G	A	G375E	1, 3	41, 28
M	7x	2022	A	A	C	E658A	1, 3	18, 15
M	30x	650	C	C	A	Q201K	1, 3	14, 13
M	30x	1173	G	G	A	G375E	3	34
M	30x	1982	T	T	C	L645L	1	16
M	30x	2022	A	A	C	E658A	1, 3	11, 18
M	30x	3068	A	A	G	S1007G	1	15
L	cDNA	830-831	GT	GT	TA	G265V	1	12
L	cDNA	3029	A	A	G	D998G	3	17
L	cDNA	6474	C	C	T	F2146F	3	14
L	7x	577	G	A	A	V181M	1	10
L	7x	5048	G	G	T	G1671V	1	11
L	7x	5451	A	A	C	K1805N	3	10
L	7x	6474	C	C	T	F2146F	1, 3	12, 11
L	30x	830-831	GT	GT	TA	G265V	3	13
L	30x	831	T	T	A	G265G	1	13
L	30x	1351	G	G	A	D439N	1, 3	40, 38
L	30x	2501	T	T	G	F822C	3	20
L	30x	3912	A	A	T	S1292S	1	11
L	30x	4512	C	T	T	V1492V	1	39
L	30x	4530	A	G	G	S1498S	1	41
L	30x	5956	G	G	A	D1974N	1	21
Supplementary Table 10. SNP summary from PHV genome isolated from cell culture and sequenced on the MinION platform.
Gene	PCR cycle	Nucleotide Position	MiSeq Reference Lab Strain	Sanger Genbank Reference	SNP	AA Change (MiSeq:SNP)	Primer Pool	SNP Frequency (%)
S	cDNA	493-494	GA	GA	TG	E151W	1, 3	33, 28
S	cDNA	1039	T	G	C	G333G	1, 3	23, 25
S	cDNA	1514	A	G	G	outside ORF	1, 3	27, 28
S	cDNA	1569	C	C	T	outside ORF	1	12
S	7x	150	A	A	G	D37G	1	28
S	7x	493-494	GA	GA	TG	E151W	1, 3	30, 15
S	7x	1514	A	G	G	outside ORF	1, 3	30, 30
S	30x	493-494	GA	GA	TG	E151W	1	21
S	30x	1039	T	G	C	G333G	3	76
S	30x	1514	A	G	G	outside ORF	1, 3	32, 31
M	cDNA	650	C	C	A	Q201K	1, 3	14, 13
M	cDNA	1173	G	G	A	G375E	1, 3	31, 34
M	cDNA	1982	T	T	C	L645L	1	19
M	cDNA	2022	A	A	C	E658A	3	19
M	cDNA	3170	G	G	A	G1041R	1	13
M	7x	33	A	A	T	outside ORF	3	12
M	7x	405	T	T	G	L119W	1	11
M	7x	1024	T	T	G	H325Q	3	10
M	7x	1679	A	A	G	K544E	3	12
M	7x	1982	T	T	C	L645L	1, 3	16, 15
M	7x	2022	A	A	C	E658A	3	24
M	30x	1982	T	T	C	L645L	1, 3	18, 17
M	30x	2022	A	A	C	E658A	3	22
L	cDNA	831	T	T	A	G265G	3	11
L	cDNA	1351	G	G	A	D439N	1, 3	36, 24
L	cDNA	2200	A	A	T	T722S	1, 3	11
L	cDNA	3167	T	T	C	F1044S	1	11
L	cDNA	3285	G	G	A	L1083L	1	14
L	cDNA	3912	A	A	T	S1292S	1	12
L	cDNA	4512	C	T	T	V1492V	1	48
L	cDNA	5956	G	G	A	D1974N	1, 3	15, 10
L	cDNA	6474	C	C	T	F2146F	1	13
L	7x	355	G	G	C	E107Q	3	21
L	7x	1351	G	G	A	D439N	1, 3	35, 35
L	7x	5956	G	G	A	D1974N	1, 3	16, 17
L	30x	166	A	A	G	K44E	1	25
L	30x	355	G	G	C	E107Q	3	17
L	30x	371	C	C	T	T112I	1	11
L	30x	1351	G	G	A	D439N	1, 3	33, 33
L	30x	2501	T	T	G	F822C	3	11
L	30x	5521	A	A	G	V1828V	1, 3	12, 12

## Sheet: BioSample_accession_numbers
Supplementary Table 11. BioSample Accession Numbers.
sample_name	BioProject Accession No.	BioSample Accession No.	Library Source	Library Selection	Library Layout	Platform	Instrument Model	Reference used for alignment
Dobrava-Belgrade virus one-step RT-PCR	PRJNA628955	SAMN14763846	Viral RNA	PCR	paired	Illumina	Illumina MiSeq	GU904042, GU904035, GU904029
Hantaan one-step RT-PCR	PRJNA628955	SAMN14763847	Viral RNA	PCR	paired	Illumina	Illumina MiSeq	X55901.1, M14627.1, M14626.1
ANDV one-step RT-PCR	PRJNA628955	SAMN14763848	Viral RNA	PCR	paired	Illumina	Illumina MiSeq	Andes lab references strain
ANDV_Sup_1pool_1x	PRJNA628955	SAMN14763849	Viral RNA	PCR	paired	Illumina	Illumina MiSeq	Andes lab references strain
ANDV_Sup_1pool_7x	PRJNA628955	SAMN14763850	Viral RNA	PCR	paired	Illumina	Illumina MiSeq	Andes lab references strain
ANDV_Sup_1pool_15x	PRJNA628955	SAMN14763851	Viral RNA	PCR	paired	Illumina	Illumina MiSeq	Andes lab references strain
ANDV_Sup_1pool_20x	PRJNA628955	SAMN14763852	Viral RNA	PCR	paired	Illumina	Illumina MiSeq	Andes lab references strain
ANDV_Sup_3pool_1x	PRJNA628955	SAMN14763853	Viral RNA	PCR	paired	Illumina	Illumina MiSeq	Andes lab references strain
ANDV_Sup_3pool_7x	PRJNA628955	SAMN14763854	Viral RNA	PCR	paired	Illumina	Illumina MiSeq	Andes lab references strain
ANDV_Sup_3pool_15x	PRJNA628955	SAMN14763855	Viral RNA	PCR	paired	Illumina	Illumina MiSeq	Andes lab references strain
ANDV_Sup_3pool_20x	PRJNA628955	SAMN14763856	Viral RNA	PCR	paired	Illumina	Illumina MiSeq	Andes lab references strain
ANDV_Cell_1pool_1x	PRJNA628955	SAMN14763857	Viral RNA	PCR	paired	Illumina	Illumina MiSeq	Andes lab references strain
ANDV_Cell_1pool_7x	PRJNA628955	SAMN14763858	Viral RNA	PCR	paired	Illumina	Illumina MiSeq	Andes lab references strain
ANDV_Cell_1pool_15x	PRJNA628955	SAMN14763859	Viral RNA	PCR	paired	Illumina	Illumina MiSeq	Andes lab references strain
ANDV_Cell_1pool_20x	PRJNA628955	SAMN14763860	Viral RNA	PCR	paired	Illumina	Illumina MiSeq	Andes lab references strain
ANDV_Cell_3pool_1x	PRJNA628955	SAMN14763861	Viral RNA	PCR	paired	Illumina	Illumina MiSeq	Andes lab references strain
ANDV_Cell_3pool_7x	PRJNA628955	SAMN14763862	Viral RNA	PCR	paired	Illumina	Illumina MiSeq	Andes lab references strain
ANDV_Cell_3pool_15x	PRJNA628955	SAMN14763863	Viral RNA	PCR	paired	Illumina	Illumina MiSeq	Andes lab references strain
ANDV_Cell_3pool_20x	PRJNA628955	SAMN14763864	Viral RNA	PCR	paired	Illumina	Illumina MiSeq	Andes lab references strain
Andes lab references strain	PRJNA628955	SAMN14763865	Viral RNA	PCR	paired	Illumina	Illumina MiSeq	AF291702.1, AF291703.2, AF291704.5
Prospect_Hill_virus_lab_reference_strain	PRJNA628955	SAMN14838478	Viral RNA	PCR	paired	Illumina	Illumina MiSeq	EF646763, X55129.1, M34011.1
Prospect_Hill_virus_Sup_1pool_cDNA	PRJNA628955	SAMN14838470	Viral RNA	PCR	single	Oxford Nanopore	MinION	Prospect_Hill_virus_lab_reference_strain
Prospect_Hill_virus_Sup_1pool_7x	PRJNA628955	SAMN14838471	Viral RNA	PCR	single	Oxford Nanopore	MinION	Prospect_Hill_virus_lab_reference_strain
Prospect_Hill_virus_Sup_1pool_30x	PRJNA628955	SAMN14838472	Viral RNA	PCR	single	Oxford Nanopore	MinION	Prospect_Hill_virus_lab_reference_strain
Prospect_Hill_virus_Sup_3pool_cDNA	PRJNA628955	SAMN14838473	Viral RNA	PCR	single	Oxford Nanopore	MinION	Prospect_Hill_virus_lab_reference_strain
Prospect_Hill_virus_Sup_3pool_7x	PRJNA628955	SAMN14838474	Viral RNA	PCR	single	Oxford Nanopore	MinION	Prospect_Hill_virus_lab_reference_strain
Prospect_Hill_virus_Sup_3pool_30x	PRJNA628955	SAMN14838475	Viral RNA	PCR	single	Oxford Nanopore	MinION	Prospect_Hill_virus_lab_reference_strain
Prospect_Hill_virus_Cell_1pool_0x	PRJNA628955	SAMN14838476	Viral RNA	PCR	single	Oxford Nanopore	MinION	Prospect_Hill_virus_lab_reference_strain
Prospect_Hill_virus_Cell_1pool_7x	PRJNA628955	SAMN14838477	Viral RNA	PCR	single	Oxford Nanopore	MinION	Prospect_Hill_virus_lab_reference_strain
Prospect_Hill_virus_Cell_1pool_30x	PRJNA628955	SAMN14838963	Viral RNA	PCR	single	Oxford Nanopore	MinION	Prospect_Hill_virus_lab_reference_strain
Prospect_Hill_virus_Cell_3pool_0x	PRJNA628955	SAMN14838981	Viral RNA	PCR	single	Oxford Nanopore	MinION	Prospect_Hill_virus_lab_reference_strain
Prospect_Hill_virus_Cell_3pool_7x	PRJNA628955	SAMN14841257	Viral RNA	PCR	single	Oxford Nanopore	MinION	Prospect_Hill_virus_lab_reference_strain
Prospect_Hill_virus_Cell_3pool_30x	PRJNA628955	SAMN14841528	Viral RNA	PCR	single	Oxford Nanopore	MinION	Prospect_Hill_virus_lab_reference_strain
Prospect_Hill_virus_1pool_one-step_RT-PCR	PRJNA628955	SAMN14838460	Viral RNA	PCR	single	Oxford Nanopore	MinION	Prospect_Hill_virus_lab_reference_strain
Prospect_Hill_virus_3pool_one-step RT-PCR	PRJNA628955	SAMN14838461	Viral RNA	PCR	single	Oxford Nanopore	MinION	Prospect_Hill_virus_lab_reference_strain
Sin_nombre_orthohantavirus_1pool_one-step_RT-PCR	PRJNA628955	SAMN14838462	Viral RNA	PCR	single	Oxford Nanopore	MinION	L37902, L37903, L37904
Sin_nombre_orthohantavirus_3pool_one-step_RT-PCR	PRJNA628955	SAMN14838463	Viral RNA	PCR	single	Oxford Nanopore	MinION	L37902, L37903, L37905
